## 2 **Panton Valentine leucocidin enhances community-acquired methicillin-resistant**

### 3 ***Staphylococcus aureus* colonisation of the gut**

4

5

6

7 Florence COUZON<sup>1</sup>, Nadège BOURGEOIS-NICOLAOS<sup>2,3\*</sup>, Yvonne BENITO<sup>1,4</sup>, Macarena  
8 LARROUDE<sup>3</sup>, Anne TRISTAN<sup>1,4</sup>, Jean-Philippe RASIGADE<sup>1,4</sup>, Binh An DIEP<sup>5</sup>, Florence  
9 DOUCET-POPULAIRE<sup>2,3,6</sup>, François VANDENESCH<sup>1,4</sup>

10

11 1- Univ Lyon, Université Claude Bernard Lyon1, Inserm U1111, Ecole Normale Supérieure  
12 de Lyon, CNRS, UMR5308, CIRI, Centre International de Recherche en Infectiologie, F-  
13 69008, Lyon, France.

14 2- AP-HP, Université Paris Saclay, Hôpital Antoine Bécclère, Service de Bactériologie-  
15 Hygiène, 157 rue de la Porte-de-Trivaux, 92140 Clamart Cedex, France

16 3-Unité Bactéries Pathogènes et Santé (UBaPS), faculté de Pharmacie, Université Paris-  
17 Saclay, 92290 Châtenay-Malabry, France

18 4-Centre National de Référence des Staphylocoques, Institut des Agents Infectieux, Hospices  
19 Civils de Lyon, Lyon, France

20 5- Division of HIV, Infectious Diseases, and Global Medicine, Department of Medicine,  
21 University of California, San Francisco, California, USA

22 6- Université Paris-Saclay, CEA, CNRS, Institute for Integrative Biology of the Cell (I2BC),  
23 91198, Gif-sur-Yvette, France

24

25 \*Present address: Université Paris-Saclay, CEA, CNRS, Institute for Integrative Biology of  
26 the Cell (I2BC), 91198, Gif-sur-Yvette, France

27

28 Running title: PVL impacts gut colonisation

29

30 Corresponding author: Francois Vandenesch. Mail: francois.vandenesch@univ-lyon1.fr

31 Mailing address: CIRI, Centre International de Recherche en Infectiologie, Domaine de la

32 Buire, rue G. Paradin, 69008, Lyon, France. Tel +33 478 77 86 57; Fax +33 478 77 86 58

33

34

35

36

37

## 38 Abstract

## 39 Objective

40 Community-acquired methicillin resistant *Staphylococcus aureus* (CA-MRSA) independently  
 41 emerged and became epidemic at the end of the 20<sup>th</sup> century. Since gut carriage was reported  
 42 for CA-MRSA and since the common feature of historical CA-MRSA is to harbour Panton  
 43 Valentine leucocidin (PVL), the question of the possible involvement of this toxin in gut  
 44 carriage was investigated in mice and cellular models.

## 45 Methods

46 CA-MRSA of three lineages (USA300, USA1100, and ST80) and their isogenic  $\Delta pvl$   
 47 derivatives, were tested in competition for gut colonisation in mice and in a model of bacterial  
 48 adhesion to mucus-producing intestinal epithelial cells.

## 49 Results

50 Mice inoculated with CA-MRSA and their  $\Delta pvl$  derivatives had their gut successfully  
 51 colonised by the three lineages regardless of the presence of PVL; however, the wild type  
 52 (WT) CA-MRSA outcompeted the  $\Delta pvl$  derivatives by at least 3 log after 40 days for all  
 53 lineages tested. *In vitro* competition of CA-MRSA with their  $\Delta pvl$  derivatives showed no  
 54 fitness disequilibrium after 6 weeks, ensuring that the results obtained in mice did not result  
 55 from direct bacterial interference. Direct fluorescence assay of mice intestine showed *S.*  
 56 *aureus* localised at the mucosal surface of the intestine and within the intestinal crypts, but  
 57 not within epithelial cells, suggesting a bacterial tropism for the mucus layer. Significant  
 58 difference in adhesion to intestinal epithelial cells between WT and *pvl* knockout was only  
 59 observed on mucus-producing cells, and not on non-producing ones.

## 60 Conclusion

61 PVL enhances CA-MRSA gut colonisation in mice by a mechanism involving adhesion-  
 62 colonisation of the mucus layer.

63

## 64 Introduction

65

66 *Staphylococcus aureus* remains one of the most common causative agents for both  
67 nosocomial and community-acquired infections. It colonises asymptotically about one  
68 third of the human population and may cause mild to severe and occasionally life-threatening  
69 infections.<sup>1</sup> Until the mid1990's, methicillin-resistant *S. aureus* (MRSA) infections were  
70 reported exclusively from hospital settings and most hospital-associated MRSA (HA-MRSA)  
71 diseases resulted from a limited number of successful clones.<sup>2</sup> However, in the beginning of  
72 the 21<sup>st</sup> century, MRSA infections began to be reported in healthy individuals without risk  
73 factors or known connections to health care institutions.<sup>3,4</sup> These community-acquired (CA)-  
74 MRSA strains had genetic backgrounds distinct from the traditional HA-MRSA strains with  
75 specific lineages predominating in different continents such as the ST8 SCC*mecIV*a pulsotype  
76 USA300 in the USA, the ST80 SCC*mecIV* in Europe, North Africa, and the Middle East, and  
77 the ST30 in Oceania.<sup>5</sup> The genetic makeup of these CA-MRSA consists in the presence of a  
78 short SCC*mecIV* element as well as a prophage carrying the Panton Valentine leucocidin  
79 (PVL), an otherwise infrequent cytotoxin targeting the C5a receptor on human myeloid cells<sup>6</sup>.  
80 A striking feature of these CA-MRSA clones was their emergence and spread in the  
81 community and their high epidemic success, notably that of the ST80 clone in North Africa,<sup>7</sup>  
82 Greece,<sup>8,9</sup> and the middle Est<sup>10</sup> and that of the USA300 clone in the American continent.<sup>11</sup>  
83 Knowledge on the underlying driving forces that rule the expansion of these clones is still  
84 limited; several non-exclusive contributing factors could be at play. An obvious contributing  
85 factor to MRSA dynamics is antibiotics use and overuse,<sup>12</sup> and in this respect Gustave et al.  
86 showed that low-level antibiotics exposure in human and animal environments likely  
87 contributed to the demographic expansion of both European ST80 and USA300 lineages in  
88 the community setting.<sup>13</sup> Moreover, the observation that PVL-positive CA-MRSA had

89 apparently increased virulence in humans,<sup>14</sup> notably for skin infections, suggests that higher  
90 bacterial load associated with increased severity of cutaneous infections could enhance  
91 dissemination between humans<sup>13</sup>. In addition to the aforementioned factors, the propensity to  
92 induce human carriage may be a determining role in the success of certain clones. Since  
93 intestinal and perineal carriage have been shown to contribute to environmental dissemination  
94 of *S. aureus*, patients with gut colonisation of *S. aureus* may serve as an important source of  
95 transmission.<sup>15,16</sup> Indeed, extra-nasal carriage and multiple sites carriage (including pelvic  
96 sites and gut carriage) have been particularly described for CA-MRSA,<sup>17–20</sup> suggesting that  
97 part of the epidemic success of these clones might be related to their ability to colonise extra-  
98 nasal sites. Given the fact that, besides the presence of SCCmecIV, the only common feature  
99 among the historical CA-MRSA (USA300, ST30, ST80) is the PVL-encoding  
100 bacteriophage,<sup>4,5</sup> the possibility that PVL plays a determining role in gut colonisation is  
101 raised. The aim of the present study was thus to assess the propensity of CA-MRSA to  
102 colonise the gut in a mouse model and to evaluate whether the presence of PVL harboured by  
103 these CA-MRSA could play a determining role in gut colonisation.

104

105

# **Material and methods.**

## **Bacterial strains.**

CA-MRSA of three prevalent lineages (ST8-USA300, ST30-USA1100, and European-ST80) were selected and further referred to as wild type (WT) CA-MRSA. Their PVL knock-out derivatives ( $\Delta pvl$ ), obtained by allelic replacement, were either already available<sup>21–23</sup> or constructed for the present study (Table 1). The BD0448 (USA1100  $\Delta pvl$ ) strain was constructed from the BD0428 parental strain<sup>23,24</sup> by transducing the *lukS/lukF::spc* mutation from the SF8300 $\Delta pvl$  strain<sup>25</sup> in which the *lukS/lukF* gene operon was replaced by a spectinomycin (*spc*) resistance gene using phage  $\phi 80\alpha$  and selection on tryptic soy agar plate containing 1000  $\mu\text{g/mL}$  spectinomycin. The successful transduction of *lukS/lukF::spc* mutation was confirmed by PCR and DNA sequencing using the previously described flanking primers X1 and X4.<sup>26</sup>

Insertion of the chloramphenicol resistance gene from pC194 plasmid<sup>27</sup> in non-essential ORFs of USA300  $\Delta pvl$  (ORF SAUSA300\_0087 to SAUSA300\_0089 of USA300 FPR3757 homologous to Newman strain ORF NWMN29 and NWMN30),<sup>28,29</sup> was achieved using the pMAD allelic replacement mutagenesis system<sup>30</sup> and the primers shown in Table 2.

## **Cells and Culture Conditions.**

The human intestinal epithelial cells HT29 ATCC HTB38<sup>31</sup> were cultured in Dulbecco's Modified Eagle's Medium (DMEM, Thermofisher) supplemented with 10% foetal bovine serum (Gibco), at 37°C under 5% CO<sub>2</sub> atmosphere. HT29-MTX10-6 (CelluloNet Biobank BB-0033-00072) cell population was derived from HT29 cells by adaptation to 10-6 Methotrexate<sup>32</sup>. HT29-MTX cells form a homogeneous population of polarised goblet cells that secrete mucins of gastric immunoreactivity. A mucus gel becomes visible on the cell surface of the cell layer at post-confluency, between 21 and 28 days of culture. These cells

maintain their ability to differentiate under normal culture conditions (without MTX). They were cultured in DMEM supplemented with 10% foetal bovine serum and 1% sodium pyruvate 100mM (Thermofisher), at 37°C under 5% CO<sub>2</sub> atmosphere.

#### **Axenic mice model of *S.aureus* gut colonisation.**

*In vivo* fitness was measured by co-colonisation experiments in a mouse model. To increase sensitivity, the latter was established in axenic female mice (C3H, *Cryopreservation, Distribution, Typage et Archivage Animal*, CNRS, Orléans, France). Mice (6-8 weeks old, 20 g) were housed in sterile isolators, as previously described.<sup>33</sup> “Germ-free” mice underwent simultaneous intragastric inoculation of 10<sup>8</sup> CFU of a mix in equal numbers of the 2 isogenic strains in a 500µl volume. Fresh faecal samples collected 3 times a week during 45 days were weighed, homogenised in PBS (0.1 mg/mL), and diluted 10 to 10. *S. aureus* was numbered by plating on Trypticase soy agar (TSA) with or without tetracycline at 0.4µg/ml for ST80, on TSA with or without spectinomycin at 1mg/ml for USA1100, and by plating on TSA without antibiotics followed by quantitative PCR (see below) for USA300. In the latter case, the respective CFU of WT and  $\Delta pvl$  was inferred from the total CFU count on plate, distributed between WT and  $\Delta pvl$  according to qPCR ratio. The remaining pellets were kept at -80°C for further analysis. At the end of the challenge, mice were sacrificed, the caecum was removed and immediately immersed in PFA 4% for at least 24hours.

#### **Relative DNA quantification**

Mouse faeces were collected and frozen until DNA extraction. Total DNA was extracted using QuickGene DNA tissue kit S and the nucleic acid isolation system QuickGene Mini80 (Kurabo, Médiane diagnostics, Plaisir, France) according to the manufacturer’s

recommendations. Prior to proteinase K digestion, each frozen faeces was crushed in lysis buffer in a 1.5 ml microcentrifuge tube using a pestle (USA scientific).

DNA was used as a template for the real-time PCR amplification using a LightCycler Nano instrument (Roche diagnostics), Fast Start Essential DNA Green Master Green (Roche diagnostics) and specific primers targeting *gyrB*, WT, and  $\Delta pvl$  strains (Table 2). The relative amounts of WT/ $\Delta pvl$  strains were determined by quantitative PCR and expressed as fold-change relative to the *gyrB* internal standard as described elsewhere.<sup>34</sup> The relative DNA quantification was processed in duplicate for each of the faeces samples and corresponding isolates obtained.

#### **Direct fluorescence assay (DFA)**

Intestinal tissues stored in PFA were then embedded in paraffin blocks and cut into 6  $\mu$ m slices. Slides were deparaffinised, cleared in xylene, and rehydrated in preparation for staining, blocked with 1% bovine serum albumin (BSA) in tris-buffered saline (TBS) supplemented with 10% of monkey serum, for 2 hours at room temperature. Bacterial localisation was detected with primary anti-*S. aureus* (ab37644, Abcam, 1:100 dilution, overnight, at +4°C) then a secondary anti-mouse alexa fluor 488 labelled antibody (ab150101, Abcam, 1:1000 dilution, 1hour, at room temperature). Nuclear counterstain with DAPI was realised. Fluorescent images of gut intestine, using 488 nm (*S. aureus*) or 405 nm (DAPI) filters, were obtained under confocal microscopy Leica SP5 X (Leica, Solms, Germany), 63 $\times$  objective under oil-immersion and analysed using Leica software LAS AF Lite (Leica Application Suite 2.6.0).



180

# 181 **In vitro competition**

182 Equal numbers ( $10^3$  CFU in a 50µl volume) of WT and  $\Delta pvl$  derivatives were inoculated in a  
 183 tube containing 5ml-volume of Tryptic Soy Broth (TSB) and incubated at 37°C with shaking  
 184 at 200 rpm during 24 hours. To facilitate the follow-up of the competition by using CFU  
 185 counting on agar plates, a chloramphenicol resistance marker was introduced in USA300  $\Delta pvl$   
 186 whilst ST80  $\Delta pvl$  and USA1100  $\Delta pvl$  already harboured a tetracycline or a spectinomycin  
 187 resistance marker, respectively (Table 1). Daily passage in fresh media was performed for 45  
 188 days by inoculating 10µl of the mixture to 5ml fresh TSB. *S. aureus* was numbered by CFU  
 189 plating on TSA with or without tetracycline at 0.4 µg/ml for ST80, on TSA with or without  
 190 chloramphenicol at 10µg/ml for USA300, and on TSA with or without spectinomycin at  
 191 1mg/ml for USA1100 to distinguish between isogenic strains.

192

# 193 **Adhesion to intestinal epithelial cells**

194

195 HT29 cells were seeded (500,000 cells/ml) into 24-well culture plates and incubated in culture  
 196 medium at 37°C in 5% CO<sub>2</sub> for 24 hours until 80% confluence. HT29-MTX cells were seeded  
 197 (100,000 cells/ml) into 24-well culture plates and incubated in culture medium at 37°C in 5%  
 198 CO<sub>2</sub> for 21 days until 100% confluence and mucus layer production. Bacterial cultures (WT  
 199 and  $\Delta pvl$ ; 8 hours of growth) were washed with phosphate-buffered saline (PBS) and  
 200 resuspended in fresh culture medium to achieve a multiplicity of infection of 10, subsequently  
 201 confirmed by CFU counting upon agar plate inoculation. Cells were washed twice with 1 ml  
 202 of PBS before the addition of bacteria. Cell cultures were then incubated at 37°C to allow for  
 203 bacterial adhesion. After 2 hours, cells were washed twice with 1 ml of PBS and unbound  
 204 bacteria were discarded. For the adhesion assay, infected cells were lysed using osmotic

shock in pure sterile water. Viable adherent bacteria released after host cell lysis were enumerated by serial dilution and plate counting on agar plates.

## **Statistical Analysis**

The statistical analyses were performed using GraphPad Prism 8 software and R software v3.6.1. Data from 2 groups (WT and  $\Delta pvl$  strains) were compared using Student two-tailed *t* test for paired samples. The significance threshold was set at 0.05. We used multivariate modelling to delineate the respective influences of *pvl*, mucus presence and genetic background on *S. aureus* adhesion in *in vitro* experiments. The % adhesion, transformed to log-odds, was modelled using mixed-effect linear regression adjusted for between-experiment variation using a random intercept per independent experiment. A first model was constructed using *pvl*, mucus and genetic background as predictor to test the independent effect of *pvl*. A second model also included an interaction term between *pvl* and mucus to test whether *pvl*-associated adhesion was dependent on the presence of mucus. Model coefficients are reported as odds-ratios of adhesion with 95% confidence intervals.

## **Ethics statement**

All mouse protocols were carried out in strict accordance with the Directive 2010/63/EU revising Directive 86/609/EEC on the protection of animals used for scientific purposes. This directive was translated in the French regulation as the Decret n°2013-118 of Feb 2013 under the jurisdiction of the Ministry of Education, Research and Technology.

The animal experiments were approved by the Committee on the Ethics of Animal Experiments n°26 of the University of Paris-Sud (agreement number 2012-120).

## Results

Both the CA-MRSA WT and  $\Delta pvl$  derivatives of all three lineages tested showed initial success in colonising the mice gut. However, between two and three weeks after the start of the experiment, the  $\Delta pvl$  strains declined whilst the WT CA-MRSA remained present in the gut at very high concentration (Figure 1); after 6 weeks, there was a 3 log (USA1100 and USA300) to 5 log (ST80) decrease between WT and  $\Delta pvl$  colonisation (Figures 1A-C).

Upon sacrifice of the mice after the challenge, DFA was performed to localise the fluorescent bacteria in the intestine of colonised mice. *S. aureus* was found on the surface of the intestinal epithelium in the mucus and also within the intestinal crypts (Figure 2). Of note, no fluorescent signal was observed within the cytoplasm of epithelial cells suggesting that colonisation of the gut by *S. aureus* did not reach an invasive step. Given the ratio of enumeration (Figure 1), the bacteria visible by DFA are very likely the WT (PVL positive).

To rule out the possibility that the  $\Delta pvl$  strains were outcompeted because of a direct bacterial interference between WT and mutant strains, an in vitro competition assay was performed by inoculating the WT and  $\Delta pvl$  strains at equivalent concentrations in BHI broth and by performing daily subcultures in fresh medium for 6 weeks. The results showed no fitness disequilibrium after 6 weeks for the three lineages (Figures 3A-C) confirming that the results obtained in mice did not result from direct bacterial interference. In addition, the same experiment was performed using strains ST80 WT and  $\Delta pvl$  isolated after 6 weeks in mice (Figure 3D). Again, there was no fitness disequilibrium between strains after intestinal colonisation of mice.

In order to confirm the localisation of *S. aureus* on the surface of intestinal cells and to highlight a potential role of PVL in mucus adhesion, bacterial adhesion to mucus-producing

intestinal epithelial cells was assessed for the three lineages and their  $\Delta pvl$  derivatives. While there were no significant difference between WT and  $\Delta pvl$  bacterial adhesion on non-mucus producing cells (HT29), adhesion on HT29 MTX was significantly higher for *S.aureus* WT, as compared to  $\Delta pvl$ , for all three lineages tested (Figure 4).

In multivariate mixed-effect regression, *pvl* presence was significantly associated with an increased adhesion independent of *S. aureus* genetic background or the presence of mucus (Table 3). Including the interaction of *pvl* and mucus presence in the model weakly improved model fit (Akaike information criterion 606.86 compared to 607.45 without interaction) and identified a positive interaction with a magnitude comparable with that of *pvl* in the base model (Table 3), although with a wider uncertainty margin. These results suggest that the positive effect of *pvl* on the adhesion of *S. aureus* to epithelial cells is potentiated by the presence of mucus.

## Discussion.

In the present study we showed that PVL contributes to the colonisation of mouse gut by three CA-MRSA lineages; namely USA300, USA1100, and ST80. We also showed that bacteria were present at the surface of the intestinal mucosa and within the intestinal crypts. Axenic mice were chosen to increase the sensitivity of the colonisation model but do not entirely reflect the reality of bacterial interactions in the gut as its lack normal microbiota. However, the more commonly used antibiotics-treated animal models have also potential draw backs as they shift the microbial population, thus impacting the phenotype studied.<sup>35</sup> In addition, if such a model had been used, the microbiota could have evolved during the six-week follow-up of the study in an uncontrolled manner. As we compared isogenic strains belonging to three lineages, we believe the results obtained are consistent and likely reflect a relevant interaction of *S. aureus* with the mucosal surface mediated by PVL. The hypothesis that PVL could contribute to other functions beyond pore formation was raised previously, following the observation that the signal peptide of the PVL LukS component enhances bacterial adhesion to matrix protein and to heparan sulfates which are highly abundant at the mucosal surface.<sup>36</sup> Whatever the precise mechanism underlying bacterial adhesion to the mucus, adhesion to intestinal epithelial cells by the three tested strains appeared to be PVL-dependent and mucus-dependent, as a difference in adhesion between WT and isogenic *pvl* knockout was only observed on mucus-producing cells. The possibility that USA300, USA1100, and ST80 wild type outcompeted their  $\Delta pvl$  derivatives in the mouse model by direct bacterial interference was ruled out by the *in vitro* competition experiment which showed no fitness disequilibrium. Moreover, WT and isogenic *pvl* knockout strains isolated after 42 days from the mice gut and further challenged in the *in vitro* competition assay also did not reveal an altered fitness of the  $\Delta pvl$  derivative. This allowed to ensure that the results of the challenge in the mouse model were not a consequence of deleterious mutations

acquired, during the 42-day experiment, by the  $\Delta pvl$  strain. Taken together these observations support the hypothesis that PVL contributes to CA-MRSA gut colonisation by enhancing interactions with the mucus. The intestinal mucosal barrier plays a key role in intestinal homeostasis notably by preventing translocation of pathogenic bacteria. Intestinal bacterial overgrowth and dysbiosis are associated with alteration of this barrier.<sup>37</sup> Here, because of the use of an axenic mouse model of gut colonisation, we could not demonstrate whether *S. aureus* colonisation of the mucosal layer had any deleterious consequences on gut microbiota and/or on intestinal permeability. However, the fact that intracellular bacteria were not found on histological sections of the caecum, nor in the intestinal cellular model (not shown), suggests that *S. aureus* does not demonstrate a potential for invading these cells and rather behave as a bystander in the mucus, resulting in a fully commensal relationship with the intestinal mucosal barrier. Although this working model needs to be deciphered further, we feel that given the complexity and considerable duration of the mice experiments, it is important to disclose these results which shed new light on a possible contributing factor to the success of CA-MRSA; that is the enhancement of CA-MRSA gastro-intestinal colonisation possibly mediated by a moonlighting function of PVL.

**Acknowledgment.** The authors thank Anabelle Bouchardon (CIQLE) for technical help in microscopy imaging and Sandra Hoys for technical help in mice experiments. We are thankful to Nicolas Barnich, Paul Verhoeven and Karen Moreau for valuable scientific advices and to V  r  na Landel from the Hospices Civils de Lyon for his precious guidance in the writing of the manuscript and his expertise in English spelling.

# **Funding.**

This study was supported by internal funding.

# **Transparency declarations**

316 None to declare

317 **Table 1. Bacterial strains used in the study**

318

| Full Strain designation      | Designation in article   | Genetic background and modification                   | Relevant phenotype         | Reference or source |
|------------------------------|--------------------------|-------------------------------------------------------|----------------------------|---------------------|
| HT200020209/<br>LUG1799      | ST80                     | ST80 MRSA-IV<br>European CA-MRSA                      | PVL+, OxaR, KanR           | 21                  |
| LUG1800                      | ST80 $\Delta pvl$        | LUG1799 $\Delta pvl::tetR$                            | PVL-, OxaR, KanaR, TetraR  | 21                  |
| LUG2216                      | ST80-44                  | LUG1799 after 44 days in mice gut                     | PVL+, OxaR, KanR           | This study          |
| LUG2217                      | ST80-44 $\Delta pvl$     | LUG1800 after 44 days in mice gut                     | PVL-, OxaR, KanaR, TetraR  | This study          |
| ST20111292/<br>LUG2012       | USA300                   | ST8 MRSA-IV USA300<br>North American variant<br>ACME+ | PVL+, OxaR, CipR           | 22                  |
| LUG2040                      | USA300 $\Delta pvl$      | LUG2012 $\Delta pvl$                                  | PVL-, OxaR, CipR           | 22                  |
| LUG 3000                     | USA300<br>$\Delta pvl-c$ | LUG2012 $\Delta pvl$ , ORF29-30:: <i>cat</i>          | PVL-, OxaR, CipR, CmR      | This study          |
| ST20101391/<br>LUG2282/BD428 | USA1100                  | ST30 MRSA USA1100<br>Southwest Pacific Clone          | PVL+, OxaR TetraR          | 23                  |
| ST20101393/<br>LUG2283/BD448 | USA1100<br>$\Delta pvl$  | LUG2282 $\Delta pvl::specR$                           | PVL-, OxaR TetraR<br>SpecR | This study          |

319

320

321

322 **Table 2. Primers used for the present study**

| Target                           | Primer     | Sequence                                  |
|----------------------------------|------------|-------------------------------------------|
| qPCR primers                     |            |                                           |
| <i>S.aureus gyrB</i>             | gyrBF      | CGGTGGCGACTTTGATCTAGCG                    |
|                                  | gyrBR      | GTCAGTTTATACAACGGTGGCTGTGC                |
| ST80 WT                          | phi620     | GTAAAAAAACACATTTGTAGATATTTTAAACTCGGTAAATC |
|                                  | phi811     | CGAAGTAGCAATAGGAGTGATTATTCC               |
| ST80 $\Delta pvl::tetra$         | phi620     | GTAAAAAAACACATTTGTAGATATTTTAAACTCGGTAAATC |
|                                  | tmn85      | CCTGTAACCTTCGAGTGC                        |
| USA300 WT                        | phi761     | CTATTAGCTGCAACATTGTCGTTAG                 |
|                                  | phi857     | CATCACCAATATTCTCAATATTGTTATCAGC           |
| USA300 $\Delta pvl$              | phidel2657 | CTCGACCCTCGAGCTAAAC                       |
|                                  | phi2749    | CGTCAATTAAGACGTGGTTACC                    |
| Mutagenesis primers              |            |                                           |
| chloramphenicol resistance locus | cat951     | AACATCGATGTAAGTCTAGCCTCGC                 |



cat1987      AACAAAGCTTCAACTAACGGGGC

**Table 3. Mixed-effect multivariate modelling of *S. aureus* adhesion to epithelial cells, with or without interaction between the presence of *pvl* and mucus**

| Factor                        | Odds-ratio of adhesion (95% CI) |                                               |
|-------------------------------|---------------------------------|-----------------------------------------------|
|                               | Base model                      | Model with <i>pvl</i> -mucus interaction term |
| <i>pvl</i> presence           | 1.49 (1.22 — 1.82)              | 1.15 (0.79 — 1.67)                            |
| Mucus presence                | 3.42 (2.65 — 4.42)              | 2.86 (2.04 — 4.00)                            |
| <i>pvl</i> and mucus presence | -                               | 1.44 (0.92 — 2.23)                            |
| USA1100 (reference)           | -                               | -                                             |
| USA300                        | 1.47 (1.15 — 1.90)              | 1.47 (1.15 — 1.90)                            |
| ST80                          | 1.07 (0.83 — 1.38)              | 1.07 (0.83 — 1.38)                            |

Figures

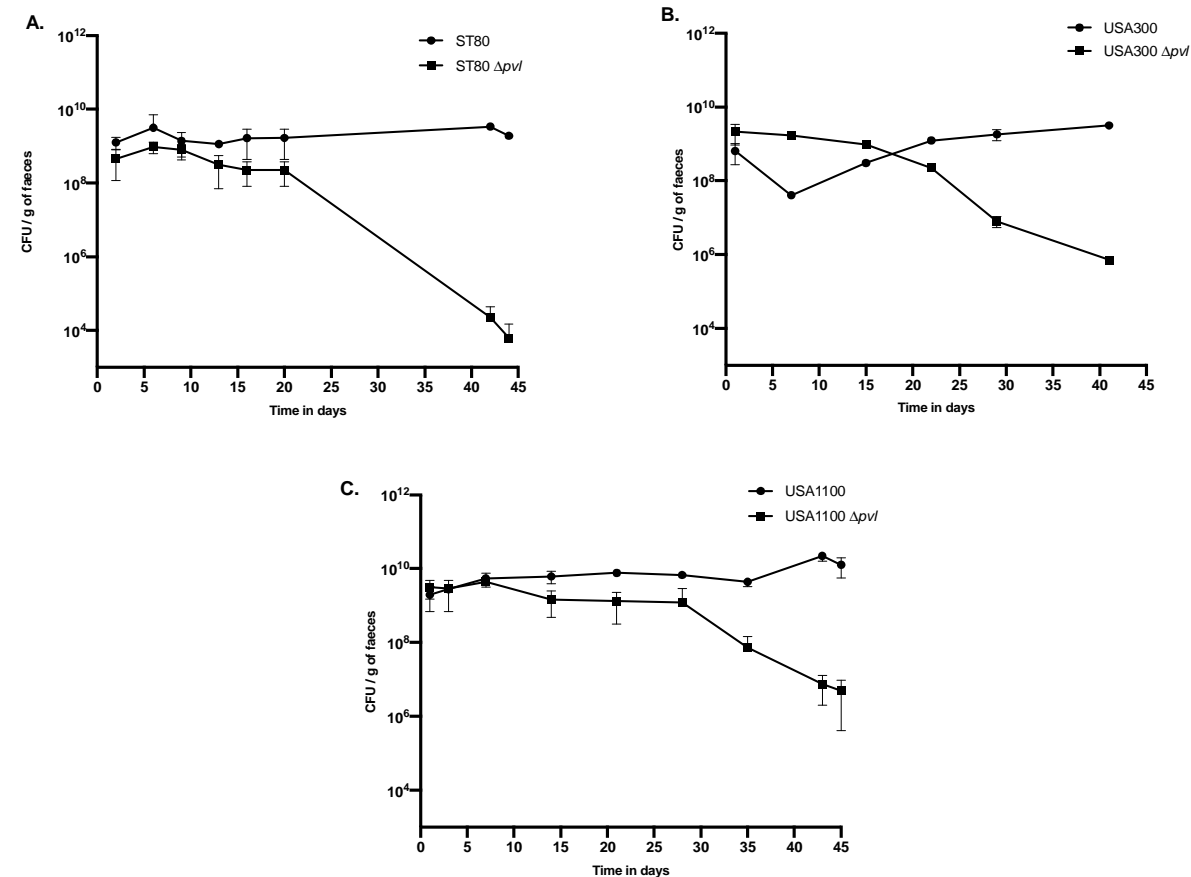

**Figure 1. Axenic mice gut colonisation by CA-MRSA wild type and  $\Delta pvl$  derivatives in dioxenic challenges**

ST80 WT and  $\Delta pvl$  (Panel A; n=4), or USA300 WT and  $\Delta pvl$  (Panel B; n=3) or USA1100 WT and  $\Delta pvl$  (Panel C; n=4) were simultaneously intragastrically inoculated at day 0 to axenic mice using  $10^8$  CFU of a mix in equal numbers of the two strains in a 500 $\mu$ l volume. The respective number of each strain in faeces was assessed by plate counting on antibiotic-containing media (ST80 and USA1100) or by plate counting without antibiotics and quantitative PCR (USA300). The results are expressed in CFU/g of faeces. In the case of USA300, the respective CFU of WT and  $\Delta pvl$  was inferred from the total CFU count on plate, distributed between WT and  $\Delta pvl$  according to qPCR ratio. Error bars show SEs.

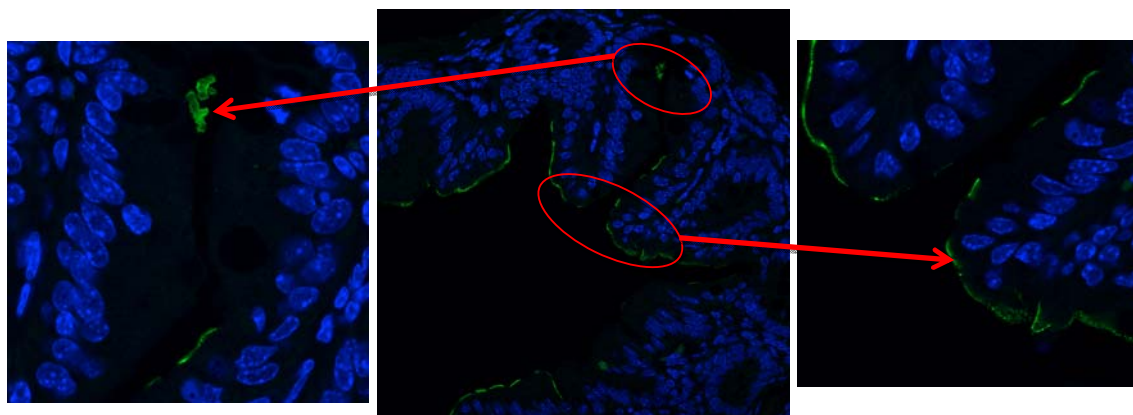

**Figure 2. Direct fluorescence assay localisation of *S. aureus* on paraffin sections of mouse intestine**

Paraffin sections prepared for histology were incubated with primary anti-*S. aureus* antibody followed by a secondary anti-mouse alexa fluor 488 (green) labelled antibody. Nuclear counterstain with DAPI (blue) was realised. Fluorescent images were obtained using confocal microscopy; regions of interest (circled) are enlarged and indicated by arrows.

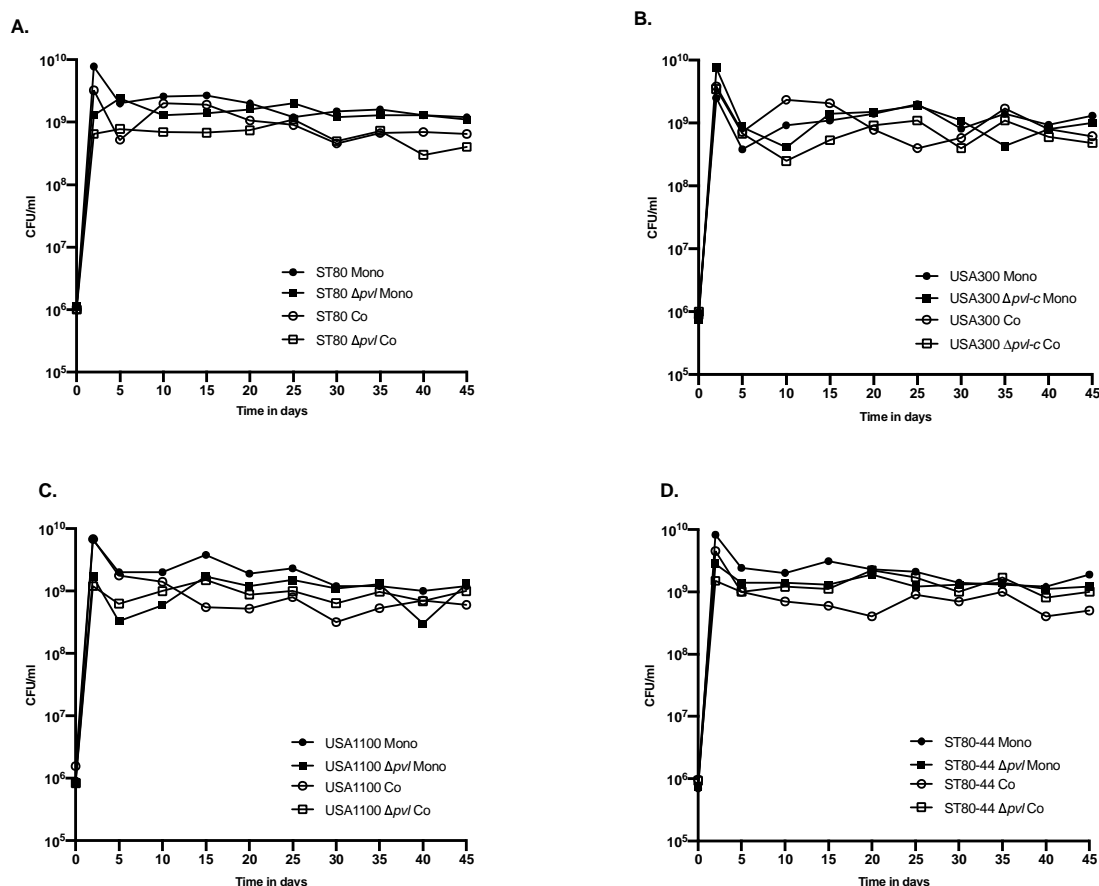

**Figure 3. In vitro competition of CA-MRSA wild type and  $\Delta pvl$  derivatives**

Equal number ( $10^3$  CFU in a 50 $\mu$ l volume) of WT and  $\Delta pvl$  derivatives of ST80 (panel A), USA300 (panel B), and USA1100 (panel C) in mono- and in co-culture were subcultured daily in TSB for 45 days. The same experiment was performed using strains ST80 WT and  $\Delta pvl$  isolated after 6 weeks in mice (ST80-44 and ST80-44  $\Delta pvl$ , panel D). *S. aureus* was numbered by CFU plating on TSA with or without tetracycline for ST80, chloramphenicol for USA300, and spectinomycin for USA1100, to distinguish between isogenic strains. The results are expressed in CFU/ml.

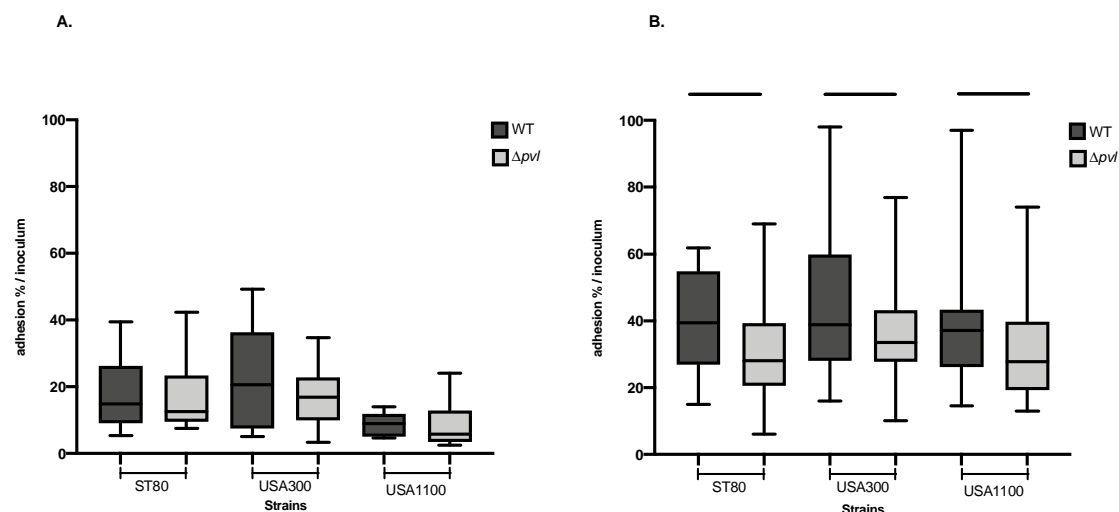

**Figure 4. Adhesion of *S. aureus* to intestinal epithelial cells**

Three lineages (USA300, USA1100 and ST80) and their isogenic  $\Delta pvl$  derivatives, were tested in a model of bacterial adhesion to intestinal epithelial cells HT29 (panel A) and to mucus-producing intestinal epithelial cells HT29 MTX (panel B). Percentages of adhered bacteria were calculated after 2 hours of infection using as reference the infection inoculum. The horizontal lines within each group represent the mean value  $\pm$  standard deviations of at least 8 independent experiments per strain. \*,  $P < .05$ ; \*\*\*,  $P < .001$

# Bibliography

1. Lowy FD. Staphylococcus aureus infections. *N Engl J Med* 1998; **339**: 520–32.
2. Thurlow LR, Joshi GS, Richardson AR. Virulence strategies of the dominant USA300 lineage of community-associated methicillin-resistant Staphylococcus aureus (CA-MRSA). *FEMS Immunol Med Microbiol* 2012; **65**: 5–22.
3. Chambers HF. The changing epidemiology of Staphylococcus aureus? *Emerg Infect Dis* 2001; **7**: 178–82.
4. Vandenesch F, Naimi T, Enright MC, *et al.* Community-acquired methicillin-resistant Staphylococcus aureus carrying Panton-Valentine leukocidin genes: worldwide emergence. *Emerg Infect Dis* 2003; **9**: 978–84.
5. Mediavilla JR, Chen L, Mathema B, Kreiswirth BN. Global epidemiology of community-associated methicillin resistant Staphylococcus aureus (CA-MRSA). *Curr Opin Microbiol* 2012; **15**: 588–95.
6. Spaan AN, Henry T, van Rooijen WJM, *et al.* The staphylococcal toxin Panton-Valentine Leukocidin targets human C5a receptors. *Cell Host Microbe* 2013; **13**: 584–94.
7. Antri K, Rouzic N, Dauwalder O, *et al.* High prevalence of methicillin-resistant Staphylococcus aureus clone ST80-IV in hospital and community settings in Algiers. *Clin Microbiol Infect Off Publ Eur Soc Clin Microbiol Infect Dis* 2011; **17**: 526–32.
8. Drougka E, Foka A, Liakopoulos A, *et al.* A 12-year survey of methicillin-resistant Staphylococcus aureus infections in Greece: ST80-IV epidemic? *Clin Microbiol Infect* 2014; **20**: O796–803.
9. Bouchiat C, Curtis S, Spiliopoulou I, *et al.* MRSA infections among patients in the emergency department: a European multicentre study. *J Antimicrob Chemother* 2017; **72**: 372–5.
10. Stegger M, Wirth T, Andersen PS, *et al.* Origin and evolution of European community-acquired methicillin-resistant Staphylococcus aureus. *mBio* 2014; **5**: e01044-01014.
11. Moran GJ, Krishnadasan A, Gorwitz RJ, *et al.* Prevalence of methicillin-resistant staphylococcus aureus as an etiology of community-acquired pneumonia. *Clin Infect Dis Off Publ Infect Dis Soc Am* 2012; **54**: 1126–33.
12. Rasigade J-P, Vandenesch F. Staphylococcus aureus: a pathogen with still unresolved issues. *Infect Genet Evol J Mol Epidemiol Evol Genet Infect Dis* 2014; **21**: 510–4.
13. Gustave C-A, Tristan A, Martins-Simões P, *et al.* Demographic fluctuation of community-acquired antibiotic-resistant Staphylococcus aureus lineages: potential role of flimsy antibiotic exposure. *ISME J* 2018; **12**: 1879–94.
14. Li M, Cheung GYC, Hu J, *et al.* Comparative Analysis of Virulence and Toxin Expression of Global Community-Associated Methicillin-Resistant Staphylococcus aureus Strains. *J Infect Dis* 2010; **202**: 1866–76.
15. Solberg CO. Spread of Staphylococcus aureus in hospitals: causes and prevention. *Scand J Infect Dis* 2000; **32**: 587–95.
16. Acton DS, Tempelmans Plat-Sinnige MJ, van Wamel W, de Groot N, van Belkum A. Intestinal carriage of Staphylococcus aureus: how does its frequency compare with that of nasal carriage and what is its clinical impact? *Eur J Clin Microbiol Infect Dis* 2008; **28**: 115.
17. Chen KT, Huard RC, Della-Latta P, Saiman L. Prevalence of methicillin-sensitive and methicillin-resistant Staphylococcus aureus in pregnant women. *Obstet Gynecol* 2006; **108**: 482–7.
18. Suggs AH, Maranan MC, Boyle-Vavra S, Daum RS. Methicillin-resistant and borderline methicillin-resistant asymptomatic Staphylococcus aureus colonization in children without identifiable risk factors. *Pediatr Infect Dis J* 1999; **18**: 410–4.
19. Faden H, Lesse AJ, Trask J, *et al.* Importance of colonization site in the current epidemic

of staphylococcal skin abscesses. *Pediatrics* 2010; **125**: e618-624.

20. Miko BA, Uhlemann A-C, Gelman A, *et al.* High prevalence of colonization with *Staphylococcus aureus* clone USA300 at multiple body sites among sexually transmitted disease clinic patients: an unrecognized reservoir. *Microbes Infect* 2012; **14**: 1040–3.

21. Perret M, Badiou C, Lina G, *et al.* Cross-talk between *Staphylococcus aureus* leukocidins-intoxicated macrophages and lung epithelial cells triggers chemokine secretion in an inflammasome-dependent manner. *Cell Microbiol* 2012; **14**: 1019–36.

22. Mairpady Shambat S, Hagggar A, Vandenesch F, *et al.* Levels of alpha-toxin correlate with distinct phenotypic response profiles of blood mononuclear cells and with agr background of community-associated *Staphylococcus aureus* isolates. *PloS One* 2014; **9**: e106107.

23. Diep BA, Carleton HA, Chang RF, Sensabaugh GF, Perdreau-Remington F. Roles of 34 virulence genes in the evolution of hospital- and community-associated strains of methicillin-resistant *Staphylococcus aureus*. *J Infect Dis* 2006; **193**: 1495–503.

24. Diep BA, Le VTM, Badiou C, *et al.* IVIG-mediated protection against necrotizing pneumonia caused by MRSA. *Sci Transl Med* 2016; **8**: 357ra124.

25. Diep BA, Palazzolo-Ballance AM, Tattevin P, *et al.* Contribution of Panton-Valentine leukocidin in community-associated methicillin-resistant *Staphylococcus aureus* pathogenesis. *PloS One* 2008; **3**: e3198.

26. Diep BA, Chan L, Tattevin P, *et al.* Polymorphonuclear leukocytes mediate *Staphylococcus aureus* Panton-Valentine leukocidin-induced lung inflammation and injury. *Proc Natl Acad Sci U S A* 2010; **107**: 5587–92.

27. Horinouchi S, Weisblum B. Nucleotide sequence and functional map of pC194, a plasmid that specifies inducible chloramphenicol resistance. *J Bacteriol* 1982; **150**: 815–25.

28. Bose JL, Fey PD, Bayles KW. Genetic tools to enhance the study of gene function and regulation in *Staphylococcus aureus*. *Appl Environ Microbiol* 2013; **79**: 2218–24.

29. Patot S, RC Imbert P, Baude J, *et al.* The TIR Homologue Lies near Resistance Genes in *Staphylococcus aureus*, Coupling Modulation of Virulence and Antimicrobial Susceptibility. *PLoS Pathog* 2017; **13**. Available at: <https://www.ncbi.nlm.nih.gov/pmc/articles/PMC5218399/>. Accessed December 10, 2019.

30. Arnaud M, Chastanet A, Débarbouillé M. New vector for efficient allelic replacement in naturally nontransformable, low-GC-content, gram-positive bacteria. *Appl Environ Microbiol* 2004; **70**: 6887–91.

31. von Kleist S, Chany E, Burtin P, King M, Fogh J. Immunohistology of the antigenic pattern of a continuous cell line from a human colon tumor. *J Natl Cancer Inst* 1975; **55**: 555–60.

32. Lesuffleur T, Barbat A, Dussaulx E, Zweibaum A. Growth adaptation to methotrexate of HT-29 human colon carcinoma cells is associated with their ability to differentiate into columnar absorptive and mucus-secreting cells. *Cancer Res* 1990; **50**: 6334–43.

33. Bourgeois-Nicolaos N, Massias L, Couson B, Butel M-J, Andreumont A, Doucet-Populaire F. Dose dependence of emergence of resistance to linezolid in *Enterococcus faecalis* in vivo. *J Infect Dis* 2007; **195**: 1480–8.

34. Labandeira-Rey M, Couzon F, Boisset S, *et al.* *Staphylococcus aureus* Panton-Valentine leukocidin causes necrotizing pneumonia. *Science* 2007; **315**: 1130–3.

35. Kennedy EA, King KY, Baldrige MT. Mouse Microbiota Models: Comparing Germ-Free Mice and Antibiotics Treatment as Tools for Modifying Gut Bacteria. *Front Physiol* 2018; **9**: 1534.

36. Tristan A, Benito Y, Montserret R, *et al.* The signal peptide of *Staphylococcus aureus* panton valentine leukocidin LukS component mediates increased adhesion to heparan sulfates. *PloS One* 2009; **4**: e5042.

37. Allaire JM, Crowley SM, Law HT, Chang S-Y, Ko H-J, Vallance BA. The Intestinal

490 Epithelium: Central Coordinator of Mucosal Immunity. *Trends Immunol* 2018; **39**: 677–96.  
491
